# Supplementary material for: Effect of anion in carboxylate-based ionic liquids on catalytic activity of transesterification with vinyl esters and the solubility of cellulose
Source: Royal Society of Chemistry journal article supplement (doi:10.1039/c8ra10042j), 2019-01-01
Supplement: c8ra10042j1.pdf [file c8ra10042j1.pdf]

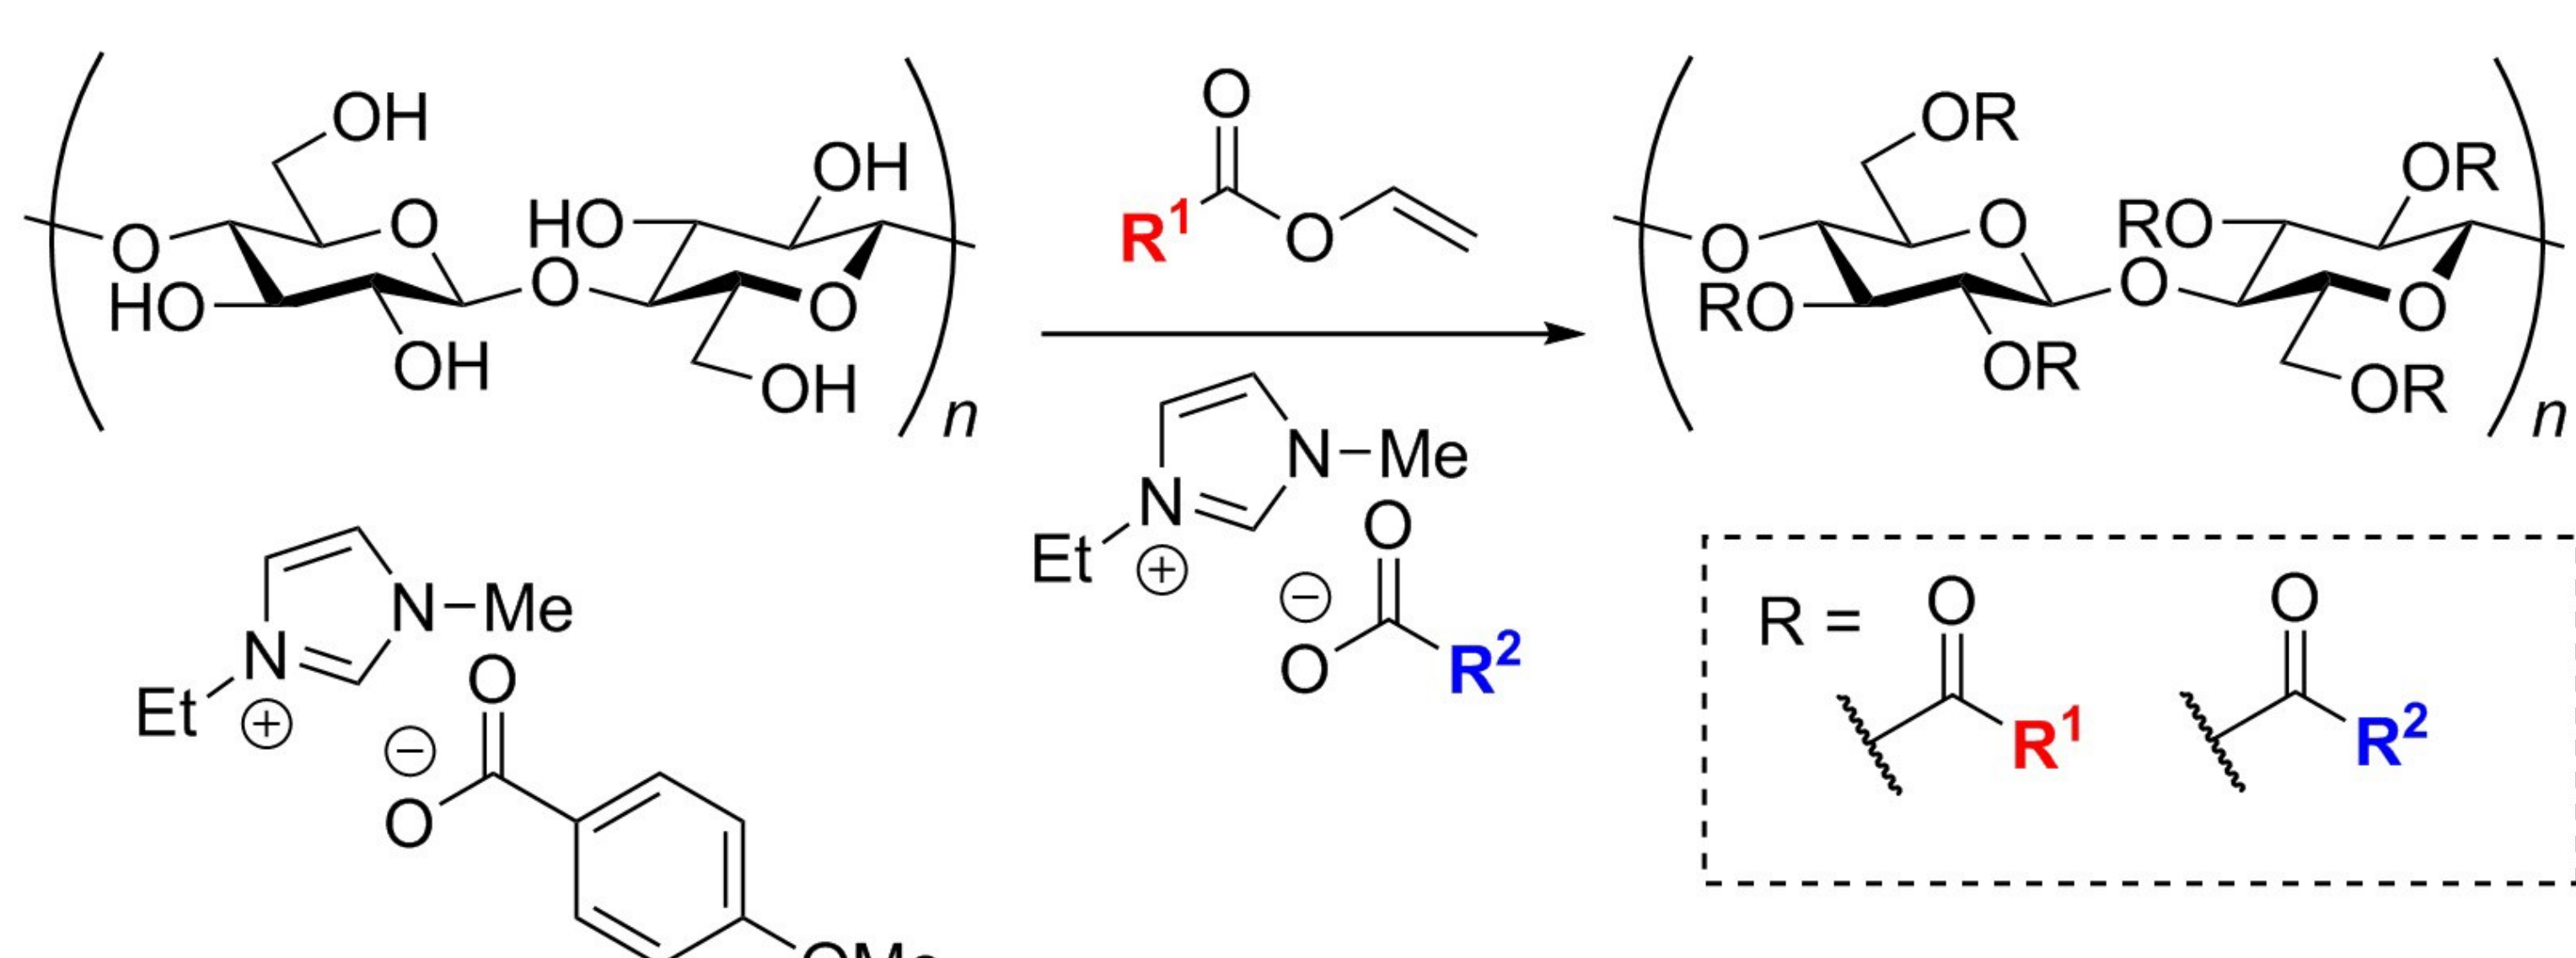

**a) Transesterification of cellulose using vinyl ester in EmimOAc**

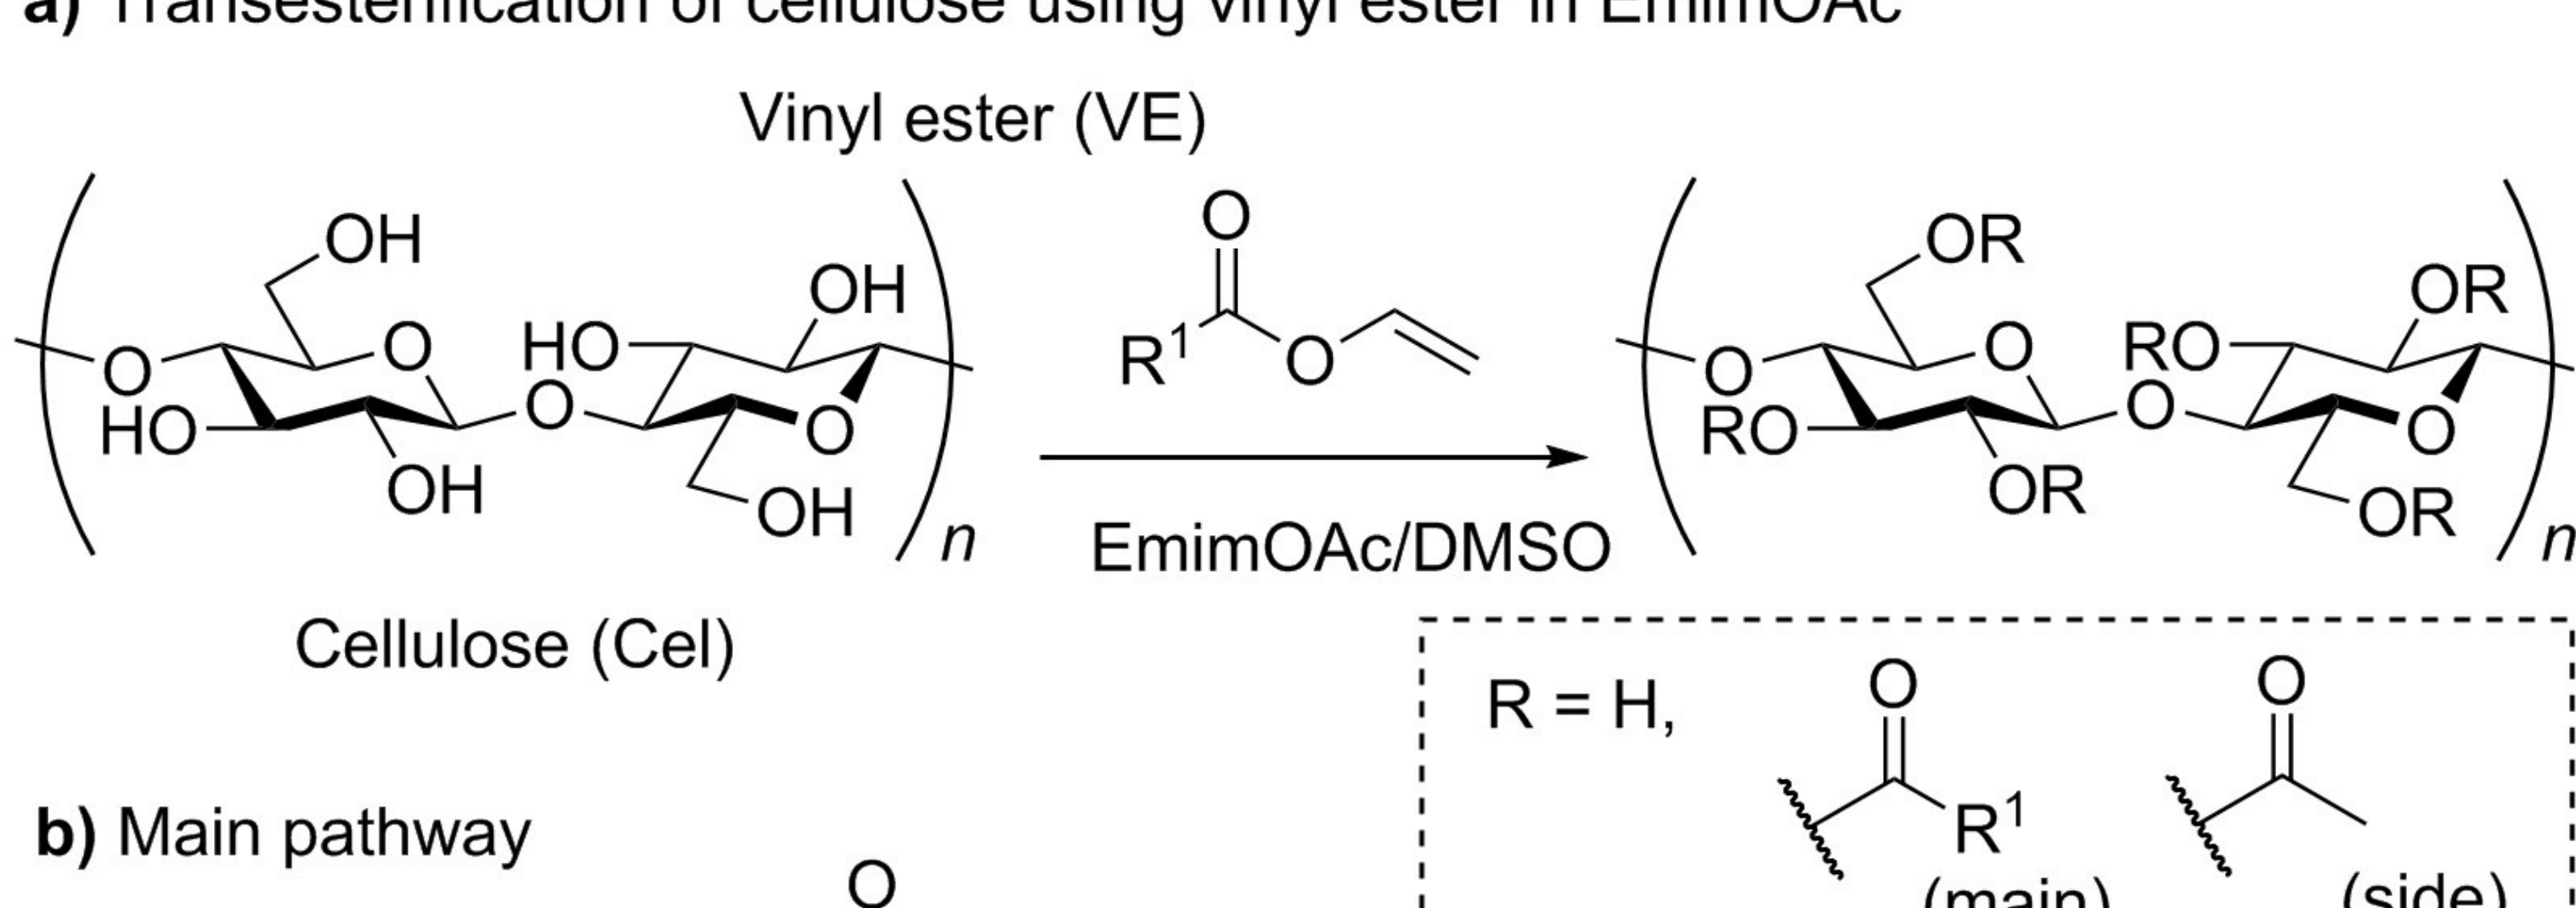

**b) Main pathway**

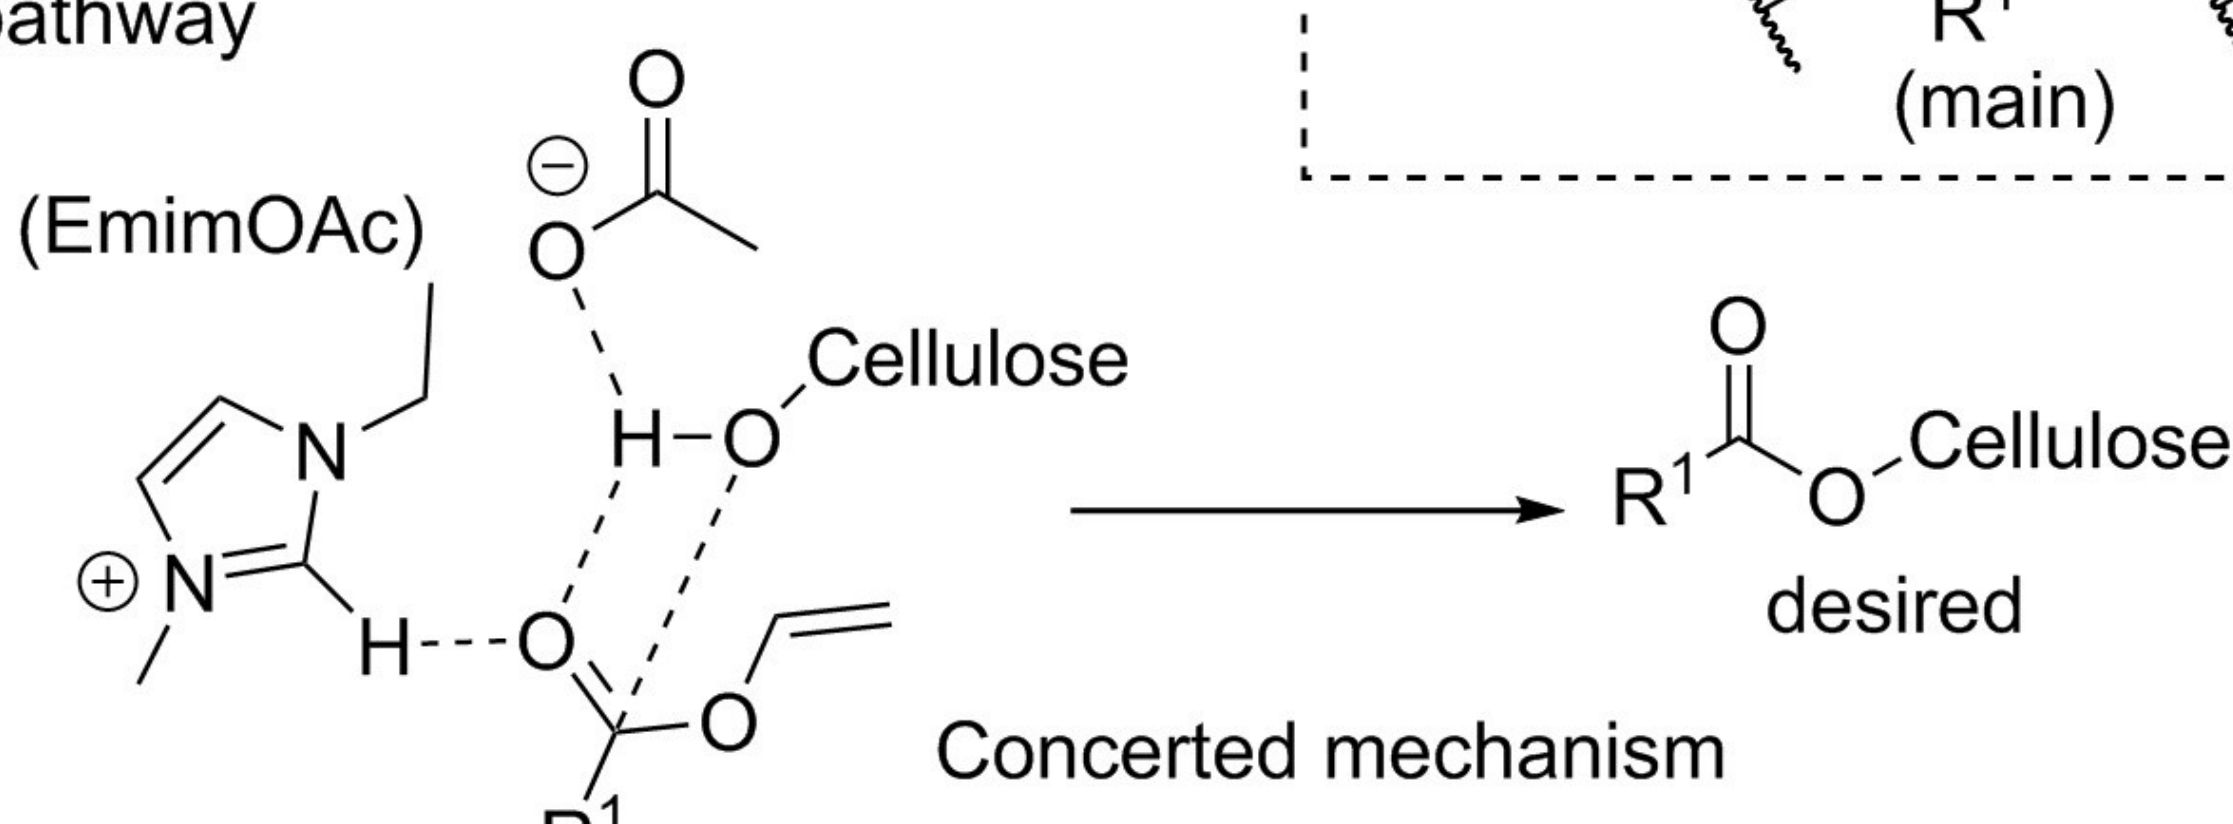

**c) Plausible side pathway**

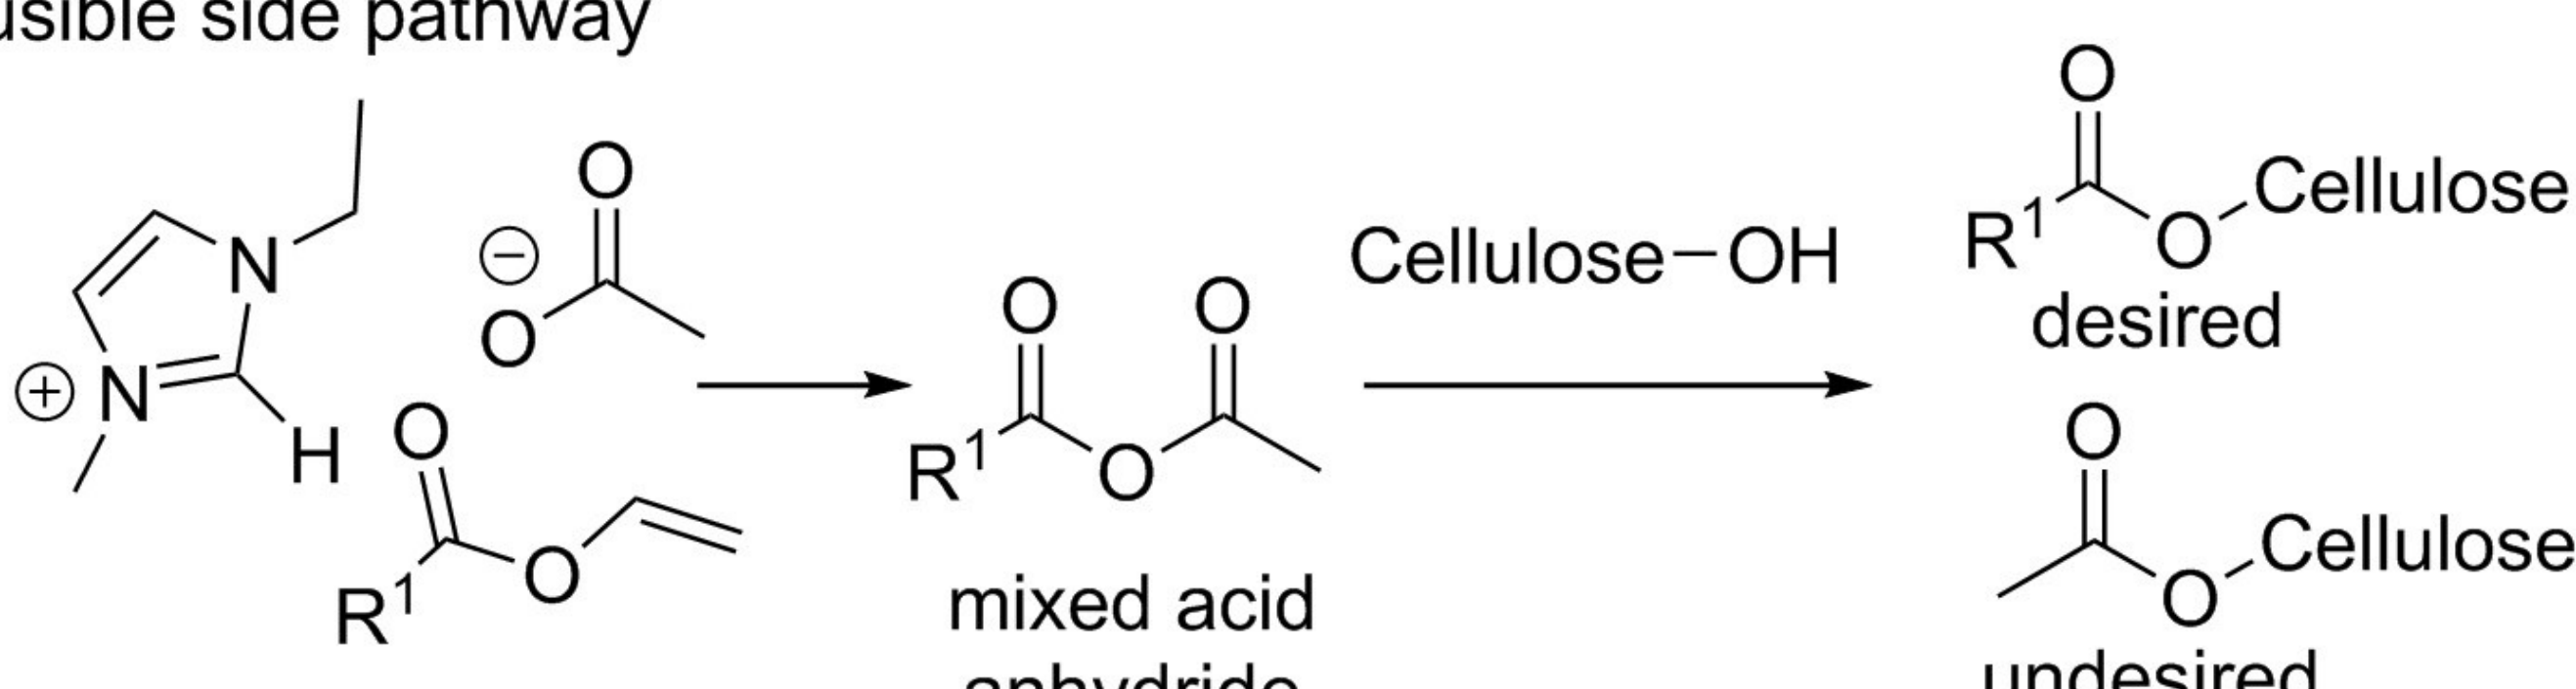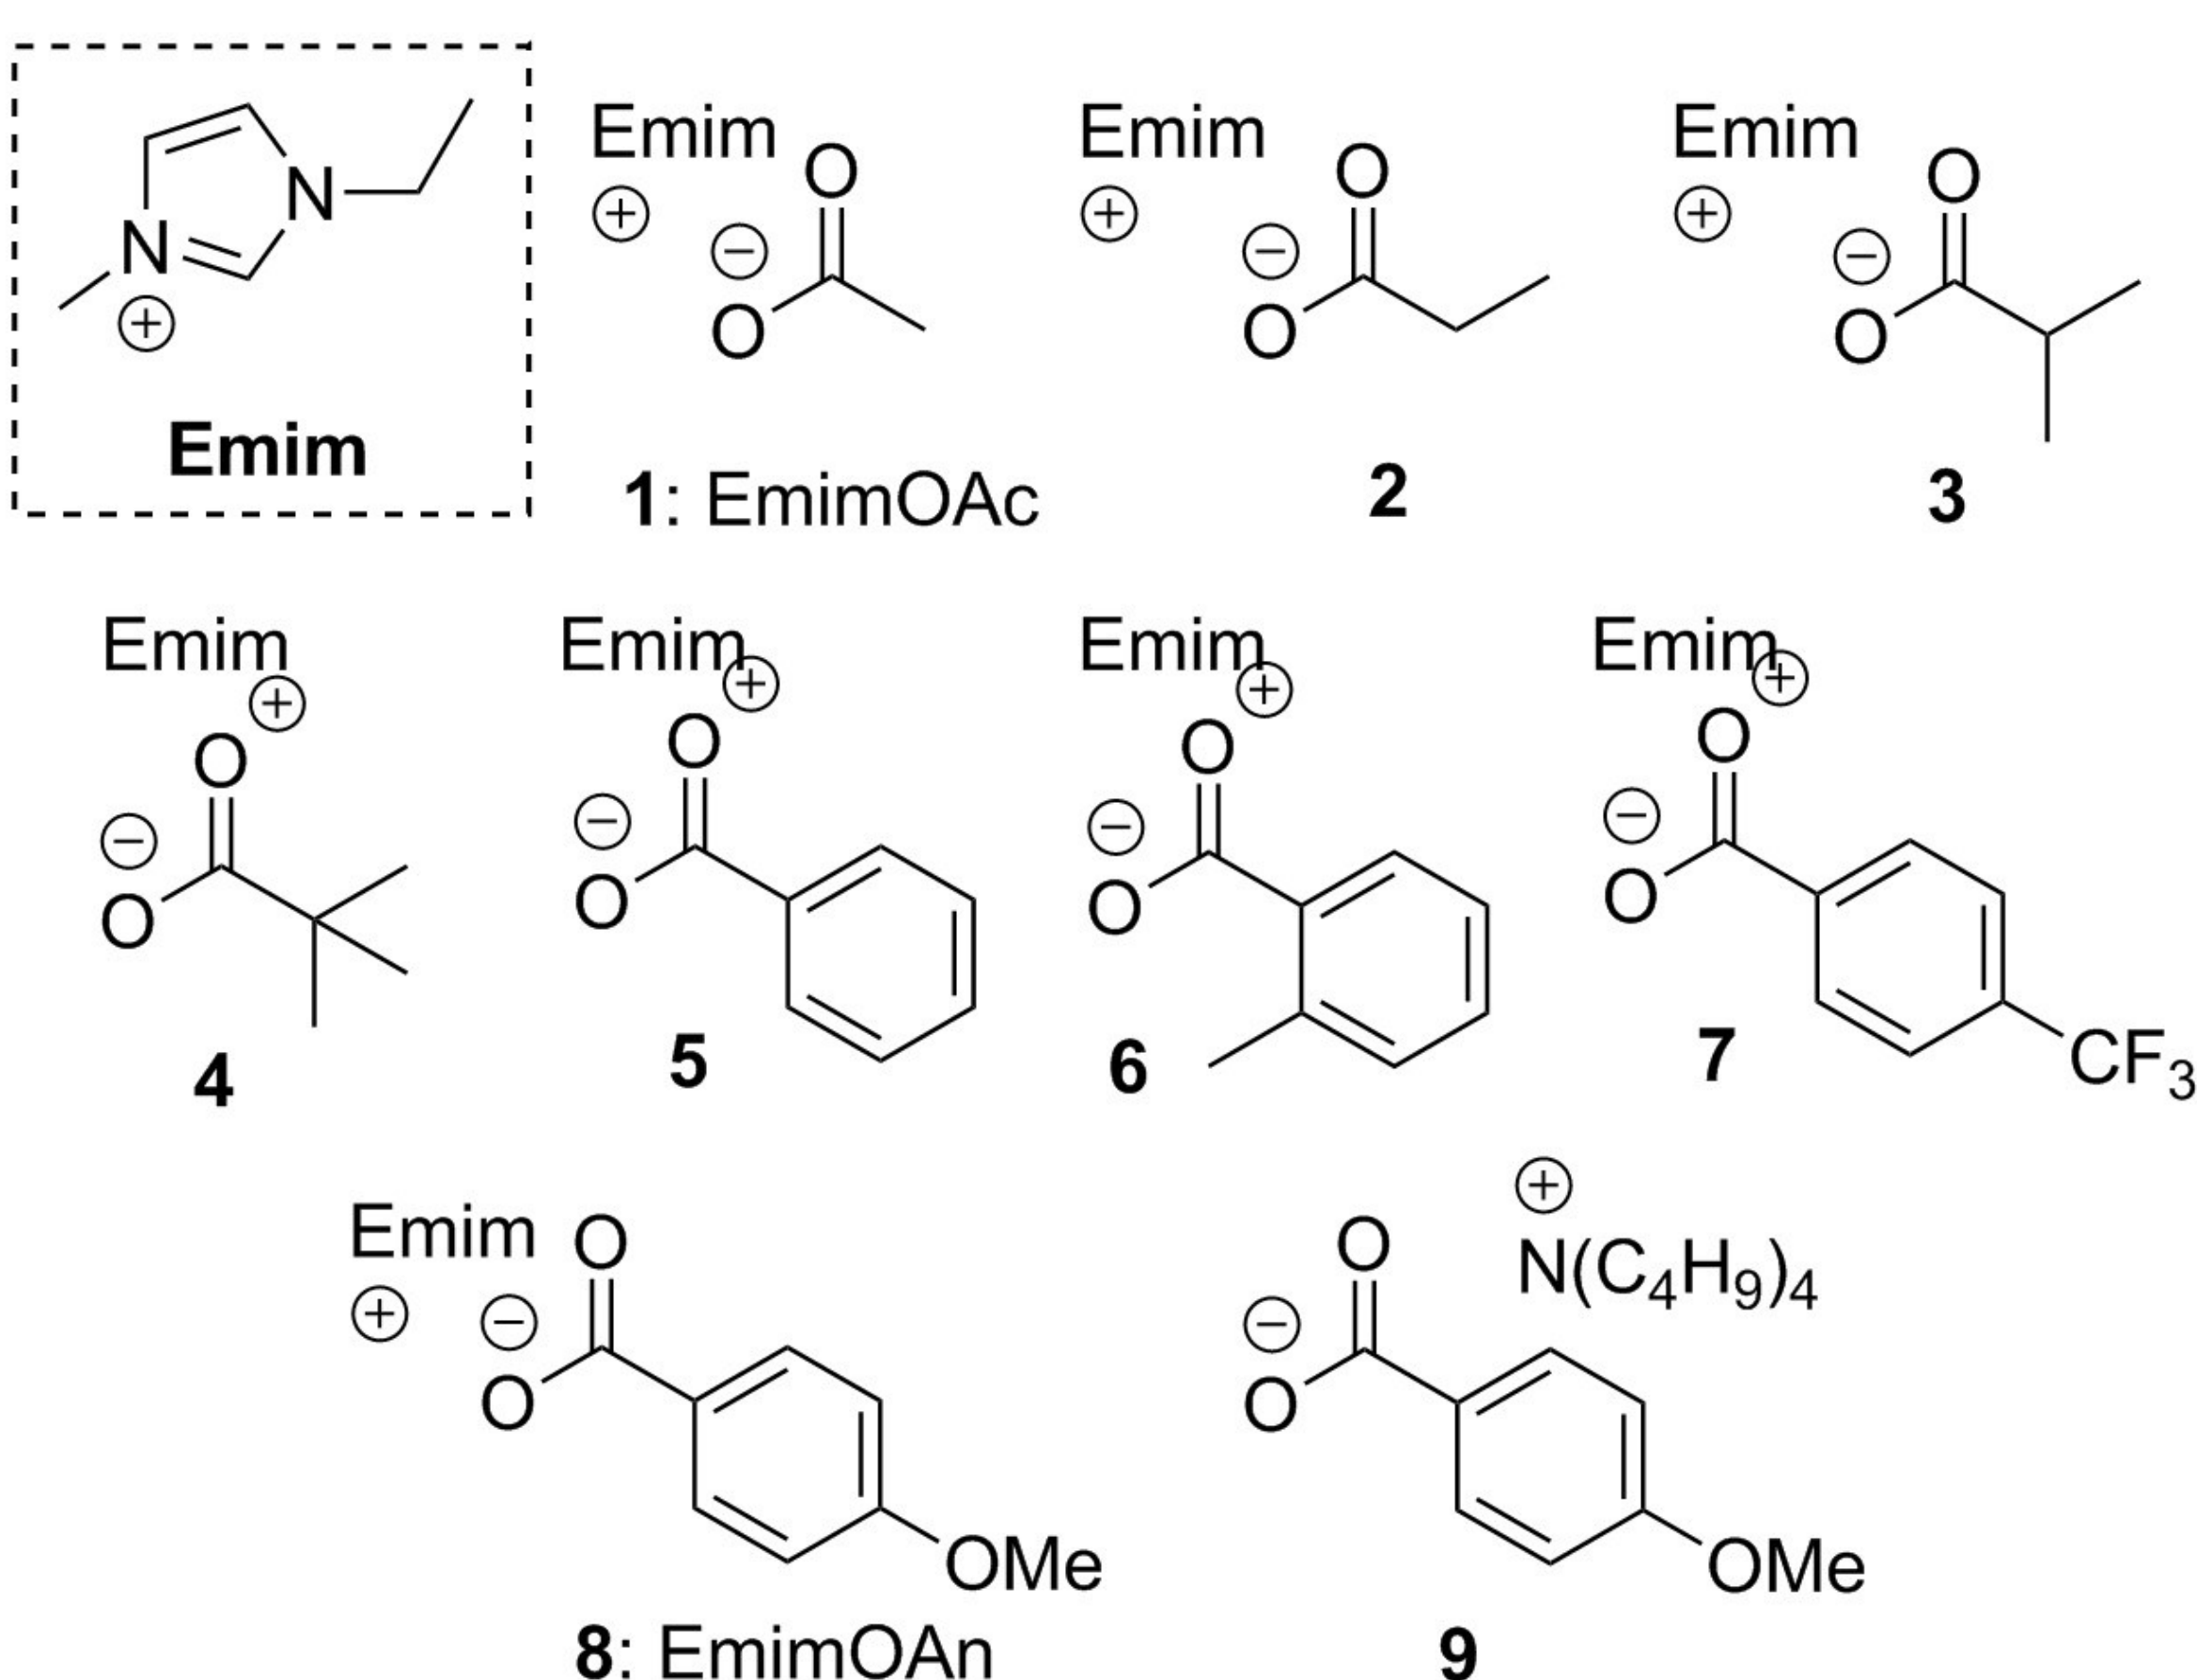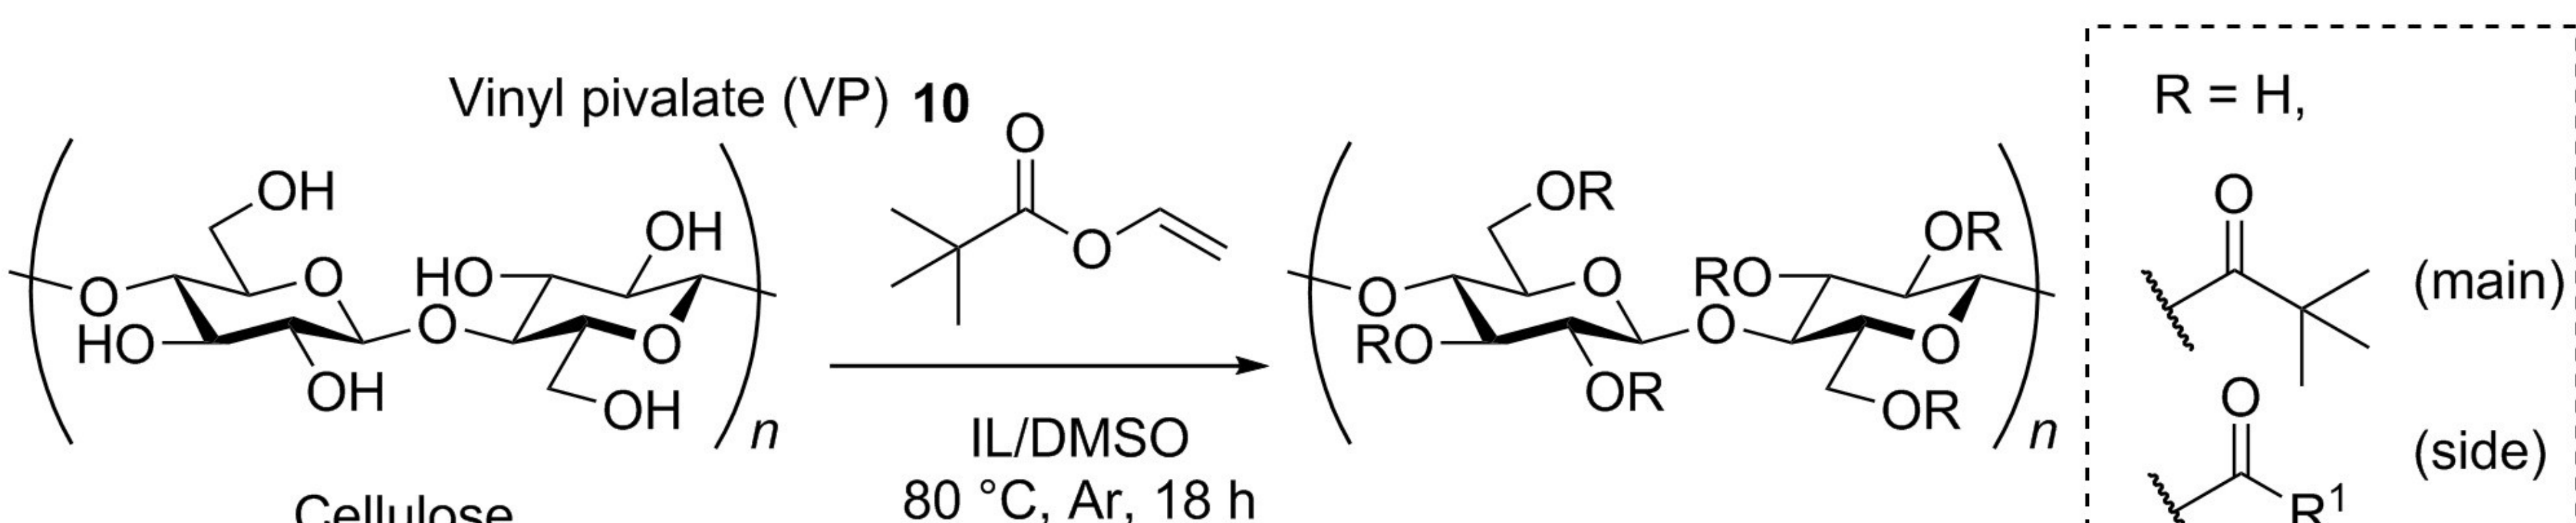

| Run | IL                 | pK <sub>a</sub> <sup>b</sup> | Solubility <sup>c</sup> | DS <sub>main</sub> <sup>d</sup> | DS <sub>side</sub> <sup>d</sup> | DS <sub>total</sub> | Selectivity (%) |
|-----|--------------------|------------------------------|-------------------------|---------------------------------|---------------------------------|---------------------|-----------------|
| 1   | <b>1</b> (EmimOAc) | 4.79                         | ++++                    | 2.43                            | 0.54                            | 2.97                | 82              |
| 2   | <b>2</b>           | 4.79                         | +++                     | 2.52                            | 0.47                            | 2.99                | 84              |
| 3   | <b>3</b>           | 4.85                         | +++                     | 2.55                            | 0.11                            | 2.66                | 96              |
| 4   | <b>4</b>           | 4.94                         | ++                      | - <sup>e</sup>                  | - <sup>e</sup>                  | 2.58                | - <sup>e</sup>  |
| 5   | <b>5</b>           | 4.20                         | ++                      | 2.27                            | 0.06                            | 2.33                | 97              |
| 6   | <b>6</b>           | 3.95                         |                         | 2.26                            | 0.04                            | 2.30                | 98              |
| 7   | <b>7</b>           | 3.69                         |                         | 1.99                            | 0.08                            | 2.07                | 96              |
| 8   | <b>8</b> (EmimOAn) | 4.47                         |                         | 2.78                            | 0.03                            | 2.81                | 99              |
| 9   | <b>9</b> (TBAOAn)  | 4.47                         |                         | 0.43                            | 0.05                            | 0.48                | 90              |

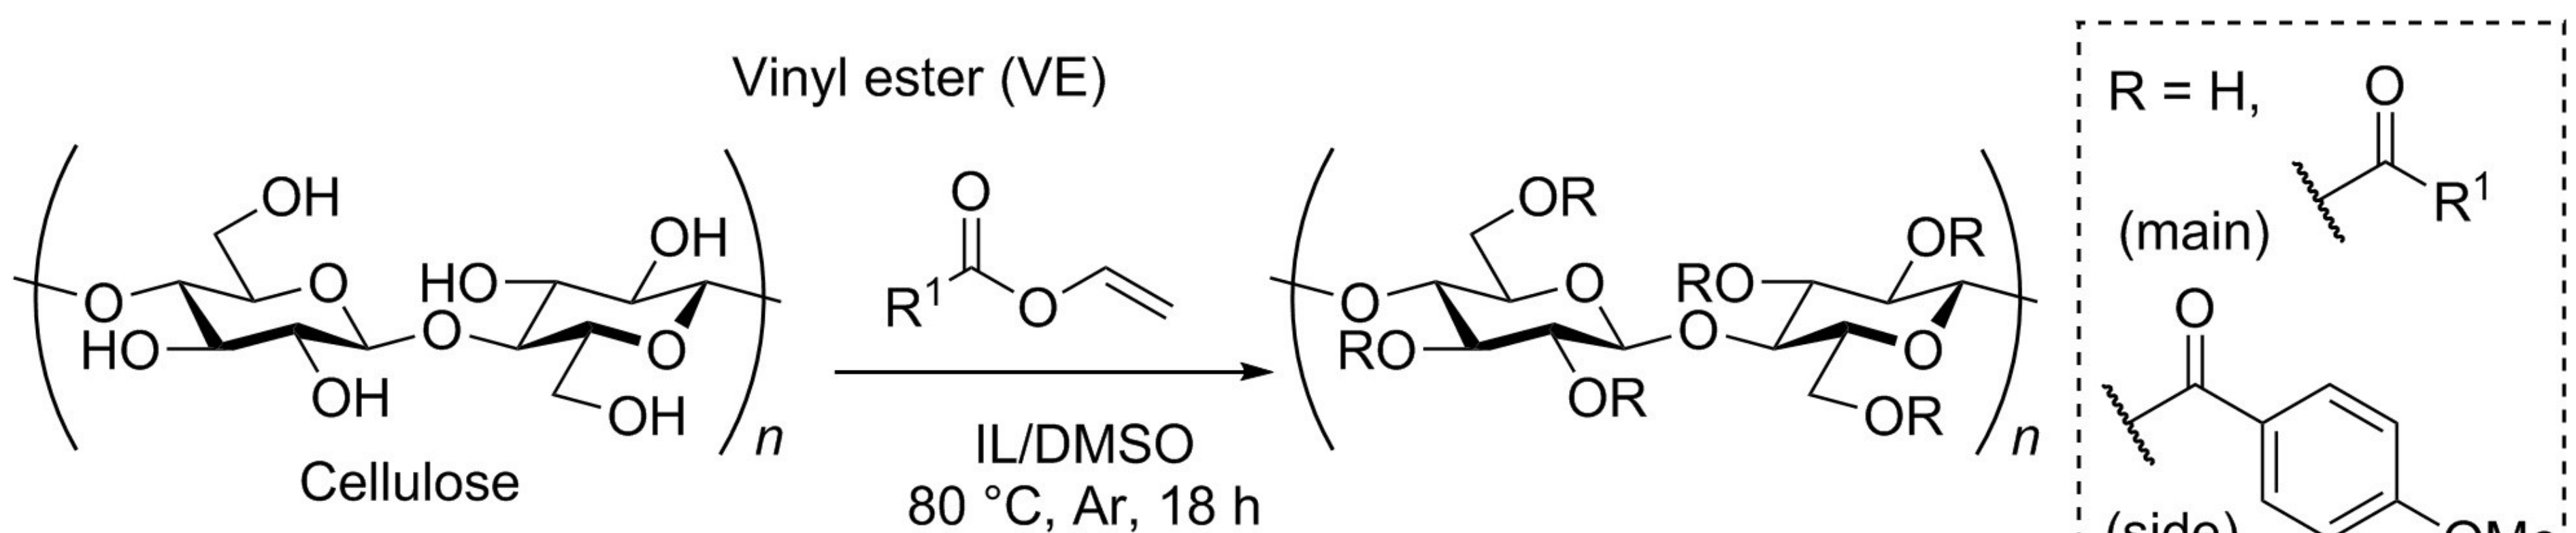

Vinyl ester:

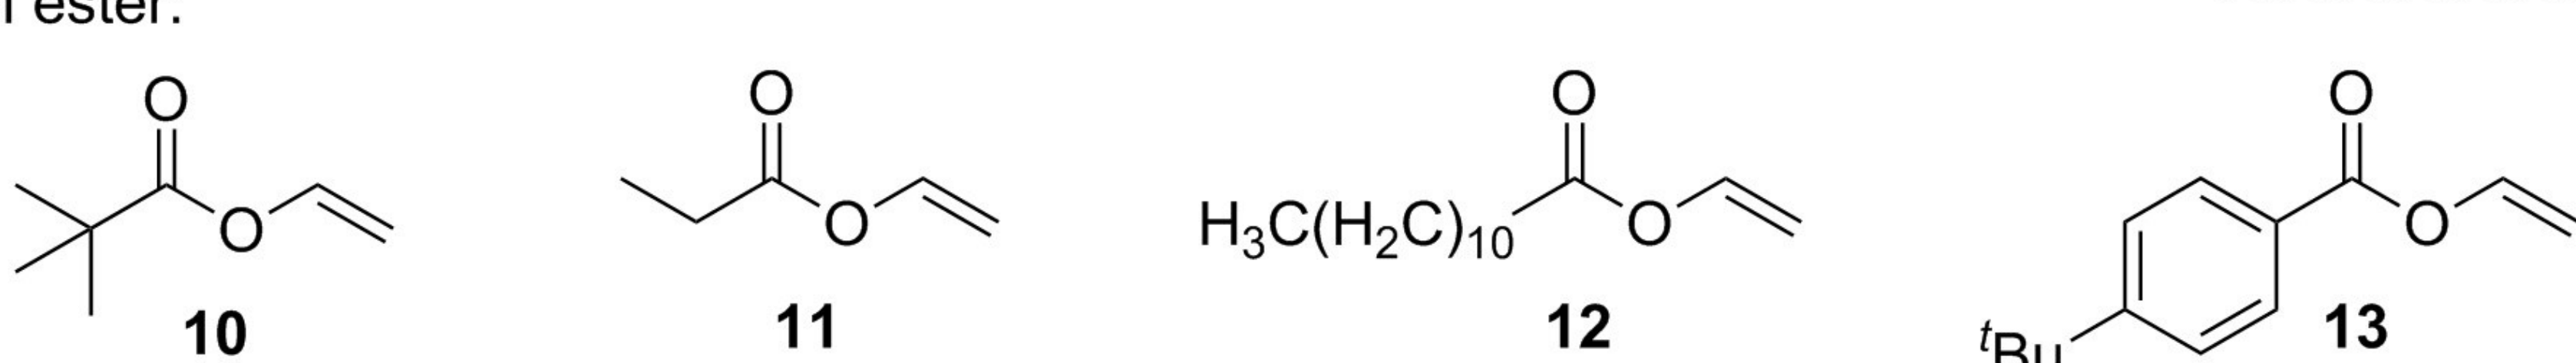

| Run | Vinyl ester | DS <sub>main</sub> <sup>b</sup> | DS <sub>side</sub> <sup>b</sup> | DS <sub>total</sub>      | Selectivity (%)      |
|-----|-------------|---------------------------------|---------------------------------|--------------------------|----------------------|
| 10  | <b>10</b>   | 2.78 (2.43) <sup>c</sup>        | 0.03 (0.54) <sup>c</sup>        | 2.81 (2.97) <sup>c</sup> | 99 (82) <sup>c</sup> |
| 11  | <b>11</b>   | 2.91                            | 0.05                            | 2.96                     | 98                   |
| 12  | <b>12</b>   | 2.87                            | 0.06                            | 2.93                     | 98                   |
| 13  | <b>13</b>   | 2.80                            | 0.01                            | 2.81                     | >99                  |
